# Supplementary material for: Lu-Lu Bond in Lu2@C60 Metallofullerenes
Source: MDPI journal article supplement (doi:10.3390/inorganics11070277), 2023-06-28
Supplement: s1 [file s1]

# Lu-Lu Bond in Lu<sub>2</sub>@C<sub>60</sub> Metallofullerenes

Yaoxiao Zhao <sup>1</sup>, Wangqiang Shen <sup>2,3,\*</sup>, Weixing Chen <sup>1</sup> and Xing Lu <sup>3,\*</sup>

<sup>1</sup> Engineering Research Center of Light Stabilizers for Polymer Materials,  
School of Materials Science and Chemical Engineering, Xi'an Technological  
University, Xi'an 710021, China;  
zhaoyaoxiao@xatu.edu.cn (Y.Z.); chenwx@xatu.edu.cn (W.C.)

<sup>2</sup> School of Materials Science and Engineering, Hefei University of Technology,  
Hefei 230009, China

<sup>3</sup> State Key Laboratory of Materials Processing and Die & Mould Technology,  
School of Materials Science and Engineering, Huazhong University of Science  
and Technology, 1037 Luoyu Road, Wuhan 430074, China

\* Correspondence: shenwq@hfut.edu.cn (W.S.); lux@hust.edu.cn (X.L.)

## Contents

|                                                                                             |   |
|---------------------------------------------------------------------------------------------|---|
| Figure S1 Several selected displacement vectors of $\text{Lu}_2@I_h\text{-C}_{60}$ .....    | 3 |
| Figure S2 Several selected displacement vectors of $\text{Lu}_2@C_{2v}\text{-C}_{60}$ ..... | 4 |
| Figure S3 Lowest unoccupied molecular orbitals.....                                         | 5 |
| Figure S4 IR vibration spectra.....                                                         | 6 |
| Coordinates for optimized geometries.....                                                   | 7 |

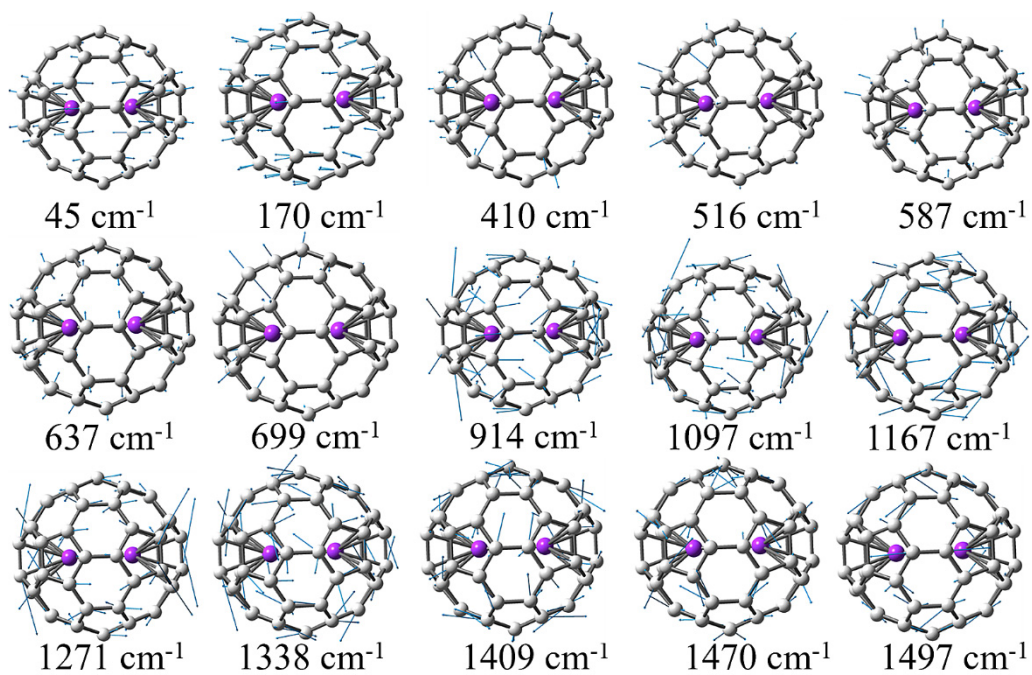

Figure S4 Several selected displacement vectors of  $\text{Lu}_2@I_h\text{-C}_{60}$  with vibration frequencies, including the lowest vibration one.

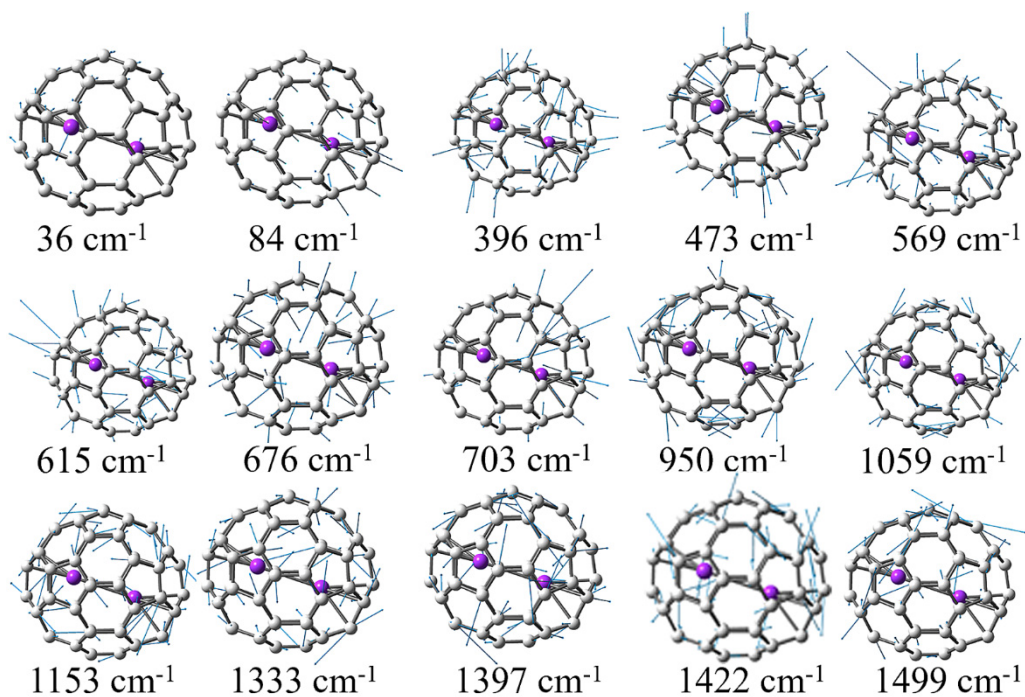

Figure S5 Several selected displacement vectors of  $\text{Lu}_2@C_{2v}\text{-C}_{60}$  with vibration frequencies, including the lowest vibration one.

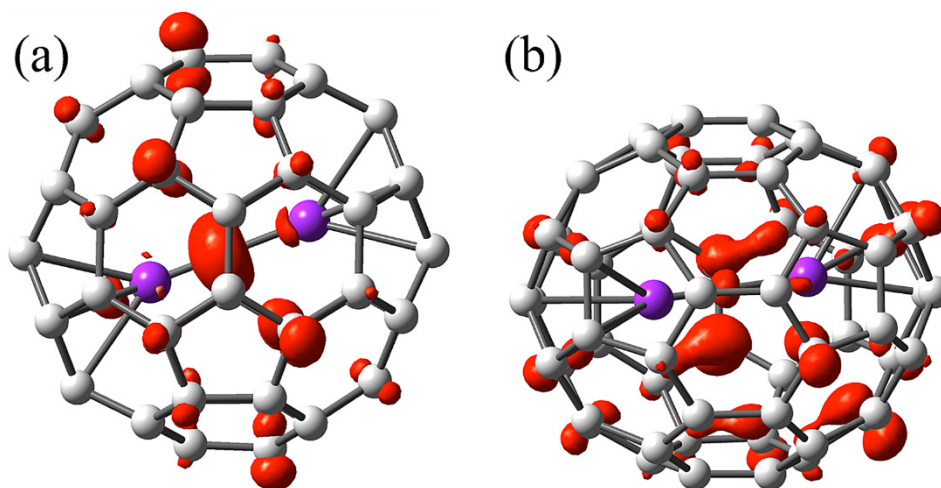

Figure S6 Lowest unoccupied molecular orbitals (LUMO) with localization of Lu<sub>2</sub>@I<sub>h</sub>-C<sub>60</sub> (a) and Lu<sub>2</sub>@C<sub>2v</sub>-C<sub>60</sub> (b) with isovalue of 0.03 a.u. for the surface.

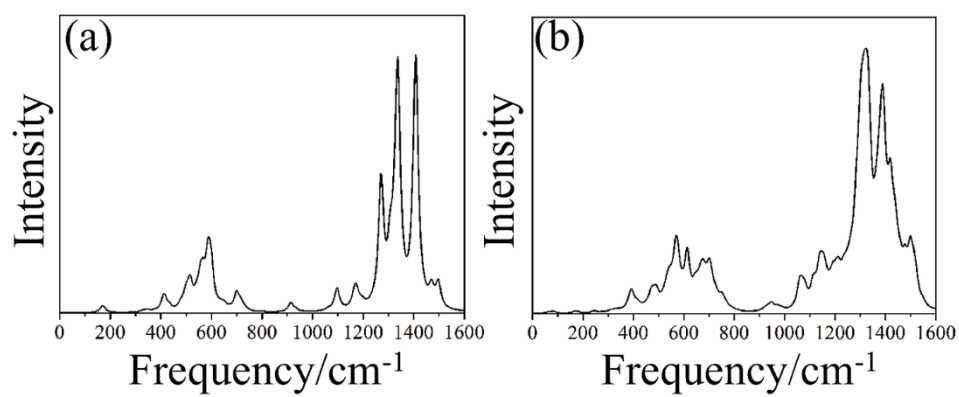

Figure S4 IR vibration spectra for  $\text{Lu}_2@I_h\text{-C}_{60}$  (a) and  $\text{Lu}_2@C_{2v}\text{-C}_{60}$  (b). The broadening function is Gaussian function and full width at half maximum is  $12\text{ cm}^{-1}$ .

## Coordinates for optimized geometries

### Lu<sub>2</sub>@I<sub>h</sub>-C<sub>60</sub>

|   |             |             |             |
|---|-------------|-------------|-------------|
| C | 0.66745000  | -3.63957500 | 0.21508200  |
| C | 0.28693300  | -3.49792200 | -1.19594000 |
| C | 1.15135000  | -2.66834800 | -2.04874800 |
| C | 0.31494100  | -1.87493400 | -2.94205000 |
| C | 0.72771100  | -0.60826900 | -3.43454300 |
| C | -0.24895500 | 0.46191100  | -3.54300100 |
| C | 0.38872700  | 1.68032800  | -3.10339800 |
| C | -0.31156800 | 2.67779300  | -2.35359700 |
| C | 0.31390400  | 3.46116900  | -1.28287900 |
| C | -0.71292800 | 3.63636300  | -0.21053600 |
| C | -0.33108000 | 3.49425500  | 1.20504000  |
| C | -1.19214800 | 2.67893900  | 2.06856300  |
| C | -0.35585300 | 1.89430100  | 2.96708600  |
| C | -0.75671800 | 0.60024400  | 3.38899900  |
| C | 0.21241100  | -0.47690500 | 3.53096000  |
| C | -0.43812500 | -1.70050100 | 3.13863800  |
| C | 0.26342300  | -2.66494700 | 2.35126900  |
| C | -0.35659900 | -3.46481100 | 1.28454700  |
| C | 1.88207900  | -2.94064300 | 0.66088400  |
| C | 1.64294800  | -2.37013700 | 1.98161900  |
| C | 2.30970600  | -1.19854100 | 2.42935600  |
| C | 1.57170700  | -0.21737100 | 3.20641600  |
| C | 1.96570000  | 1.09208500  | 2.74257800  |
| C | 1.03599100  | 2.17541700  | 2.64202100  |
| C | 1.08338200  | 3.17475000  | 1.56927500  |
| C | 2.09515200  | 3.00236800  | 0.51264100  |
| C | 1.70735100  | 3.14660000  | -0.92402500 |
| C | 2.37852400  | 2.07057000  | -1.66086100 |
| C | 1.76759000  | 1.36904800  | -2.74828000 |
| C | 1.98195500  | -0.04162200 | -2.96869600 |
| C | 2.78115500  | -0.78996900 | -2.06185400 |
| C | 2.39371000  | -2.10561700 | -1.62173500 |
| C | 2.77297000  | -2.24706500 | -0.21508100 |
| C | 3.39320000  | -1.01842000 | 0.20947500  |
| C | 3.19107100  | -0.49295200 | 1.51482400  |
| C | 2.96652800  | 0.92166700  | 1.69697500  |
| C | 2.98924100  | 1.84298500  | 0.60219200  |
| C | 3.18556700  | 1.29124700  | -0.73167600 |
| C | 3.37134400  | -0.10260200 | -0.92203300 |
| C | -1.12374000 | -3.17917800 | -1.55915400 |
| C | -1.07815300 | -2.16468500 | -2.62262000 |

|    |             |             |             |
|----|-------------|-------------|-------------|
| C  | -2.02914000 | -1.10677600 | -2.76030700 |
| C  | -1.60069000 | 0.19948900  | -3.19003400 |
| C  | -2.31516400 | 1.18159700  | -2.38683600 |
| C  | -1.69253900 | 2.39267400  | -1.98791400 |
| C  | -1.92922500 | 2.95366800  | -0.66435800 |
| C  | -2.78802500 | 2.22100500  | 0.21493300  |
| C  | -2.41058000 | 2.08039000  | 1.61568700  |
| C  | -2.84232000 | 0.77942700  | 2.06957800  |
| C  | -2.02336700 | 0.02776000  | 2.95569600  |
| C  | -1.82276200 | -1.38790500 | 2.78212400  |
| C  | -2.40391400 | -2.06265500 | 1.66442600  |
| C  | -1.74527700 | -3.15099300 | 0.92676700  |
| C  | -2.13190600 | -3.00708500 | -0.50588100 |
| C  | -3.01499100 | -1.83486500 | -0.60004700 |
| C  | -3.03435200 | -0.93566400 | -1.71045000 |
| C  | -3.22383900 | 0.47573100  | -1.49477500 |
| C  | -3.45298100 | 1.00728800  | -0.19643500 |
| C  | -3.46327300 | 0.10519300  | 0.94228000  |
| C  | -3.20447900 | -1.27571300 | 0.73355600  |
| Lu | 0.30151900  | 1.49915300  | 0.06882700  |
| Lu | -0.33568600 | -1.47489800 | -0.06186500 |

# **Lu<sub>2</sub>@C<sub>2v</sub>\_C<sub>60</sub>**

|   |             |             |             |
|---|-------------|-------------|-------------|
| C | -3.01030800 | -1.15708900 | -1.00845500 |
| C | -2.75731100 | -1.81671700 | 0.26428300  |
| C | -2.76918400 | -1.02512500 | 1.50932900  |
| C | -1.97805100 | -1.46161100 | 2.62712400  |
| C | -1.40768300 | -0.46696800 | 3.51533000  |
| C | -0.01990300 | -0.78163300 | 3.72068200  |
| C | 0.73643000  | 0.43559000  | 3.65920200  |
| C | 1.95938000  | 0.36595600  | 2.93835800  |
| C | 2.36106400  | 1.51524700  | 2.14064500  |
| C | 3.16223100  | 1.01907900  | 1.03583600  |
| C | 3.11067000  | 1.65890600  | -0.22366300 |
| C | 3.14498000  | 0.88551100  | -1.44410800 |
| C | 2.22016200  | 1.49285400  | -2.38132100 |
| C | 1.43297000  | 0.69118800  | -3.23342700 |
| C | 0.02859600  | 1.01629500  | -3.43367700 |
| C | -0.69995100 | -0.24163600 | -3.54988900 |
| C | -2.00480400 | -0.34020400 | -2.98016100 |
| C | -2.34584400 | -1.56997800 | -2.24741300 |
| C | -3.17902800 | 0.27851500  | -1.06431700 |
| C | -2.56474100 | 0.78539200  | -2.27886000 |

|    |             |             |             |
|----|-------------|-------------|-------------|
| C  | -1.86404600 | 2.02920300  | -2.20668600 |
| C  | -0.54898900 | 2.14946500  | -2.81803000 |
| C  | 0.26618900  | 2.99389900  | -1.95903100 |
| C  | 1.61173400  | 2.64636800  | -1.72556700 |
| C  | 2.17436600  | 2.75993600  | -0.39433800 |
| C  | 1.39344800  | 3.25605900  | 0.69255000  |
| C  | 1.51449000  | 2.67424700  | 2.02491500  |
| C  | 0.19485000  | 2.72723200  | 2.69674800  |
| C  | -0.17865000 | 1.57289200  | 3.51384000  |
| C  | -1.52025700 | 0.94805500  | 3.32695100  |
| C  | -2.41245000 | 1.41256300  | 2.30720100  |
| C  | -3.01325300 | 0.41675500  | 1.41604900  |
| C  | -3.16955700 | 1.04351200  | 0.12709700  |
| C  | -2.57420400 | 2.37344200  | 0.17769900  |
| C  | -1.86556900 | 2.80303100  | -0.99470100 |
| C  | -0.55472400 | 3.41112300  | -0.82564000 |
| C  | -0.01155300 | 3.60365300  | 0.48011200  |
| C  | -0.77646500 | 3.27482100  | 1.71376700  |
| C  | -2.09747100 | 2.63555700  | 1.52537300  |
| C  | -0.93986500 | -2.44746400 | 2.40201600  |
| C  | 0.31039300  | -1.94434900 | 2.94686100  |
| C  | 1.53832000  | -2.01691600 | 2.17411900  |
| C  | 2.40004100  | -0.84935600 | 2.26772100  |
| C  | 3.18311800  | -0.43495400 | 1.12501000  |
| C  | 3.16618900  | -1.19366300 | -0.06244000 |
| C  | 3.17244800  | -0.53341800 | -1.35875400 |
| C  | 2.42255000  | -1.36433500 | -2.27350600 |
| C  | 1.55118100  | -0.76366900 | -3.22521000 |
| C  | 0.24592900  | -1.35140700 | -3.50410400 |
| C  | -0.13276000 | -2.61638100 | -2.89101400 |
| C  | -1.49327400 | -2.72585600 | -2.29460600 |
| C  | -1.38488900 | -3.50347400 | -1.06416400 |
| C  | -1.94450500 | -3.02187800 | 0.19383200  |
| C  | -0.91275000 | -3.19427000 | 1.20942000  |
| C  | 0.33917200  | -3.54238700 | 0.55485000  |
| C  | 1.55258000  | -2.82934800 | 0.94808600  |
| C  | 2.41037700  | -2.42749900 | -0.16202400 |
| C  | 2.01294000  | -2.59111500 | -1.56758300 |
| C  | 0.80879100  | -3.28543300 | -1.95103700 |
| C  | 0.01999600  | -3.83117100 | -0.84646100 |
| Lu | -0.14119600 | -1.42520800 | -0.81394900 |
| Lu | -0.26359900 | 1.09694000  | 1.05098700  |
